# Supplementary material for: Synthesis and effects of oxadiazole derivatives on tyrosinase activity and human SK-MEL-28 malignant melanoma cells
Source: Royal Society of Chemistry journal article supplement (doi:10.1039/c6ra12754a), 2016-01-01

## Synthesis and effects of oxadiazole derivatives on tyrosinase activity and human SK-MEL-28 malignant melanoma cells

Mohd Fadhlzil Fasihi Mohd Aluwi<sup>a</sup>, Kamal Rullah<sup>a, b</sup>, Tan Huan Huan<sup>c</sup>, Chan Kok Meng<sup>c</sup>, Tan Si Jie<sup>a</sup>, Leong Sze Wei<sup>d</sup>, Ahmad Hasnan Mansor<sup>a</sup>, Bohari M Yamin<sup>e</sup> and Lam Kok Wai<sup>a,\*</sup>

<sup>a</sup>*Drugs and Herbal Research Centre, Faculty of Pharmacy, Universiti Kebangsaan Malaysia, Jalan Raja Muda Abdul Aziz, 50300 Kuala Lumpur, Malaysia*

<sup>b</sup>*Sekolah Tinggi Ilmu Farmasi Riau, Universitas Riau, Kampus Bina Widya Km 12.5, Simpang baru-Pekanbaru, Indonesia*

<sup>c</sup>*Toxicology Laboratory, Faculty of Health Sciences, Universiti Kebangsaan Malaysia, Jalan Raja Muda Abdul Aziz, 50300 Kuala Lumpur.*

<sup>d</sup>*Institute of Bioscience, Universiti Putra Malaysia, 43400, Serdang, Selangor, Malaysia*

<sup>e</sup>*School of Chemical Sciences and Food Technology, Universiti Kebangsaan Malaysia, 43600 Bangi, Selangor, Malaysia*

### Supplementary Data

Synthesis and effects of oxadiazole derivatives on tyrosinase activity and SK-MEL-28 malignant melanoma cells

---

\* Corresponding author. Tel.: +603-92897031; e-mail: david\_lam@ukm.edu.my

## 1. Chemistry

### 1.1. General information

All reagents were purchased from Aldrich and Merck and were used without further purification. All the solvents used in the syntheses were analysis and synthesis grade. The solvents used in spectroscopic measurements were spectroscopic grade.  $^1\text{H}$  and  $^{13}\text{C}$  NMR spectra were recorded on a Bruker 500 MHz spectrometer. ESI-HRMS spectra were recorded on a Bruker micrOTOF Mass Spectrometer. Single-crystal X-ray experiment was performed on a Bruker D-QUEST diffractometer (Bruker, AXS Inc., Madison, WI, USA). Melting points were determined on a STUART SMP10 melting point apparatus.

### 1.2. $^1\text{H}$ and $^{13}\text{C}$ NMR

NMR spectra of compound **1**

Compound **1**. 5-(naphthalen-1-ylmethyl)-1,3,4-oxadiazole-2-thiol. Brown solid. M.p 172-173°C.  $^1\text{H}$  NMR (500 MHz, DMSO)  $\delta$  7.71 (d,  $J$  = 8.2 Hz, 1H), 7.61 (d,  $J$  = 8.7 Hz, 1H), 7.56 (d,  $J$  = 7.9 Hz, 1H), 7.26 – 7.12 (m, 4H), 4.25 (s, 2H).  $^{13}\text{C}$  NMR (126 MHz, DMSO)  $\delta$  177.87, 163.06, 133.53, 131.39, 129.56, 128.75, 128.46, 128.16, 126.75, 126.19, 125.77, 123.71, 28.86. ESI-HRMS: ( $\text{C}_{13}\text{H}_{10}\text{N}_2\text{OS}$ ) calc.  $[\text{M}+\text{H}]$  243.3040, found 243.3029.

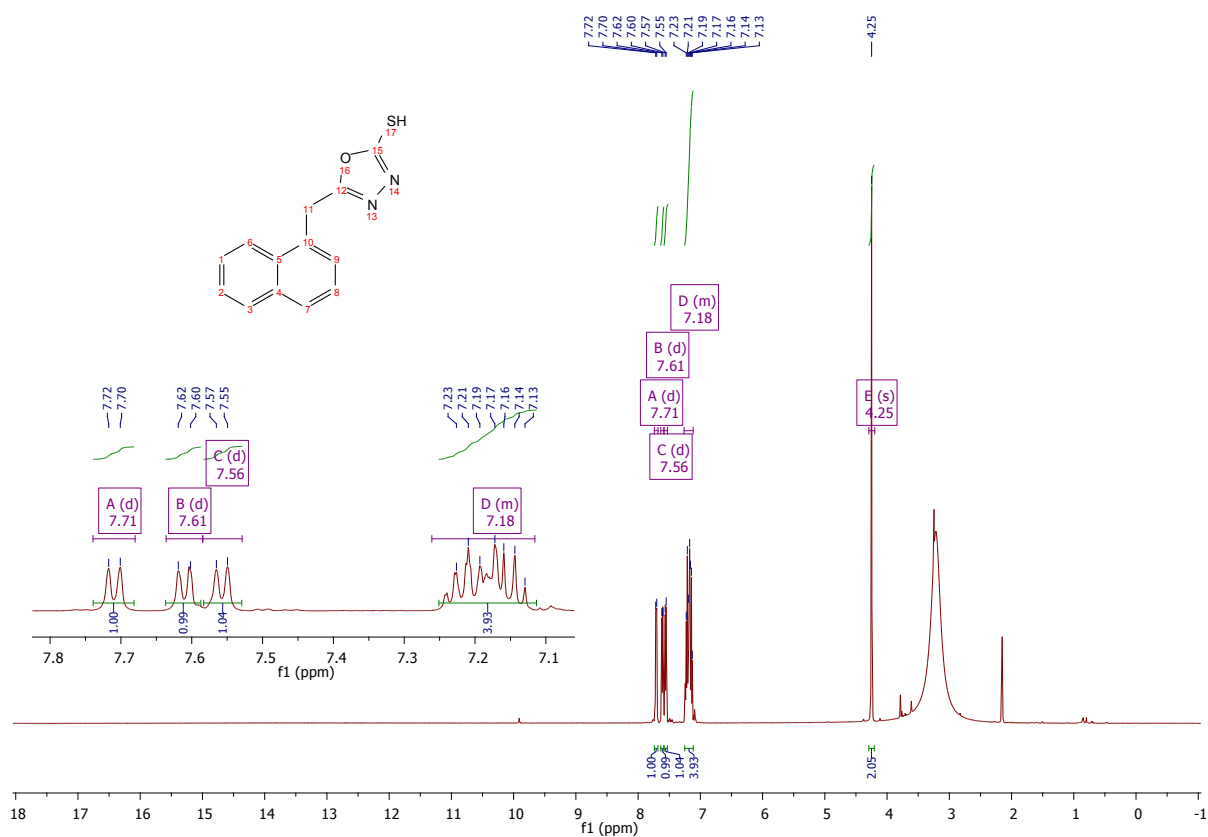

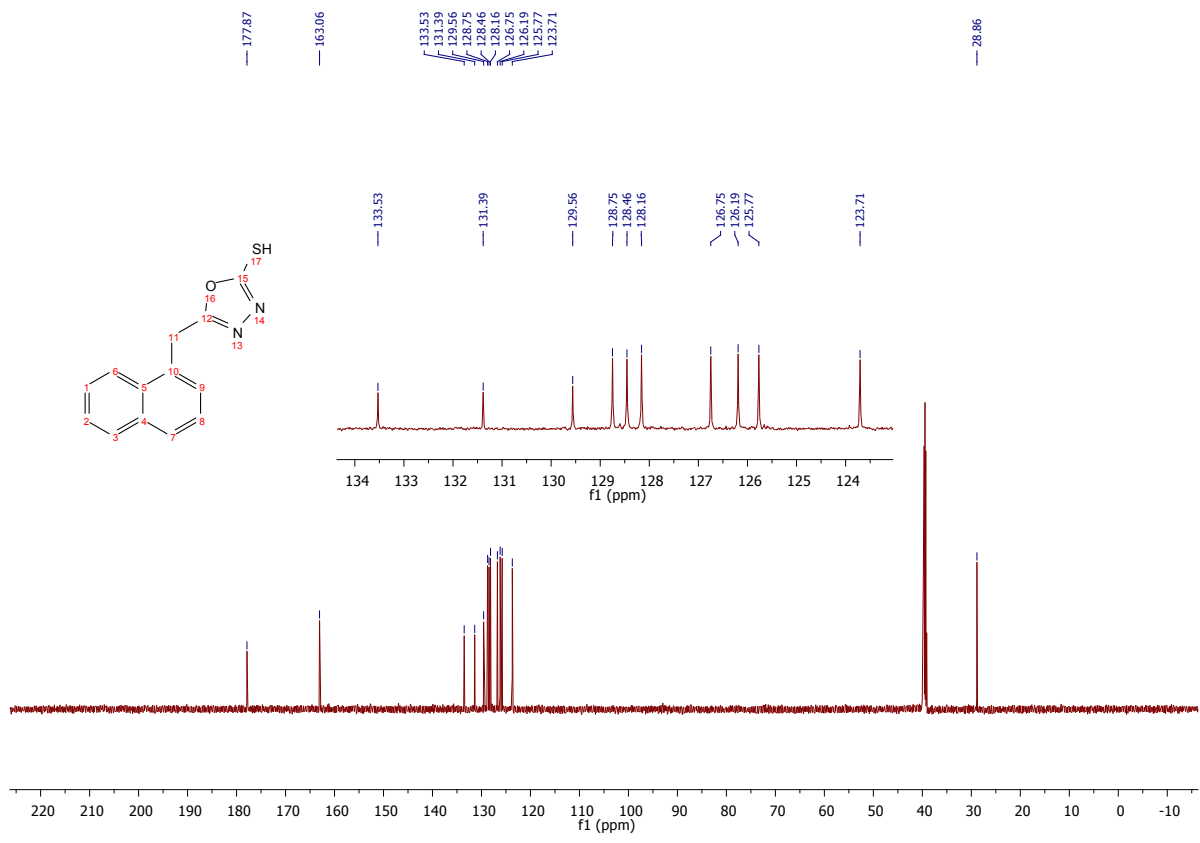

## NMR spectra of compound **2**

Compound **2**. 5-(naphthalen-2-ylmethyl)-1,3,4-oxadiazole-2-thiol. Pale yellow solid. M.p 138-139°C.  $^1\text{H}$  NMR (500 MHz, DMSO)  $\delta$  7.61, 7.60, 7.59, 7.59, 7.57, 7.55, 7.23, 7.22, 7.21, 7.20, 7.19, 7.15, 7.13, 3.99.  $^{13}\text{C}$  NMR (126 MHz, DMSO)  $\delta$  178.05, 163.11, 133.09, 132.27, 131.18, 128.53, 127.85, 127.73, 127.69, 127.20, 126.64, 126.33, 31.37. ESI-HRMS: ( $\text{C}_{13}\text{H}_{10}\text{N}_2\text{OS}$ ) calc.  $[\text{M}+\text{H}]$  243.3040, found 243.3033.

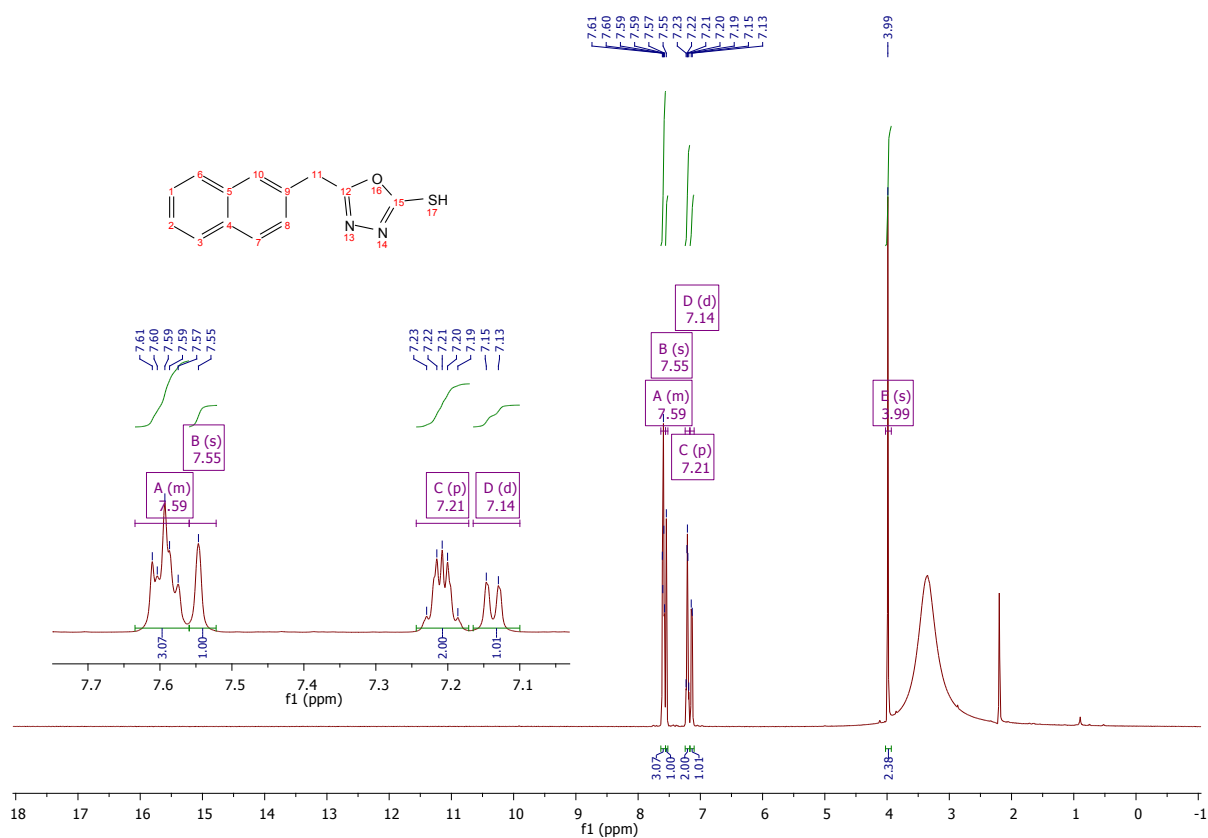

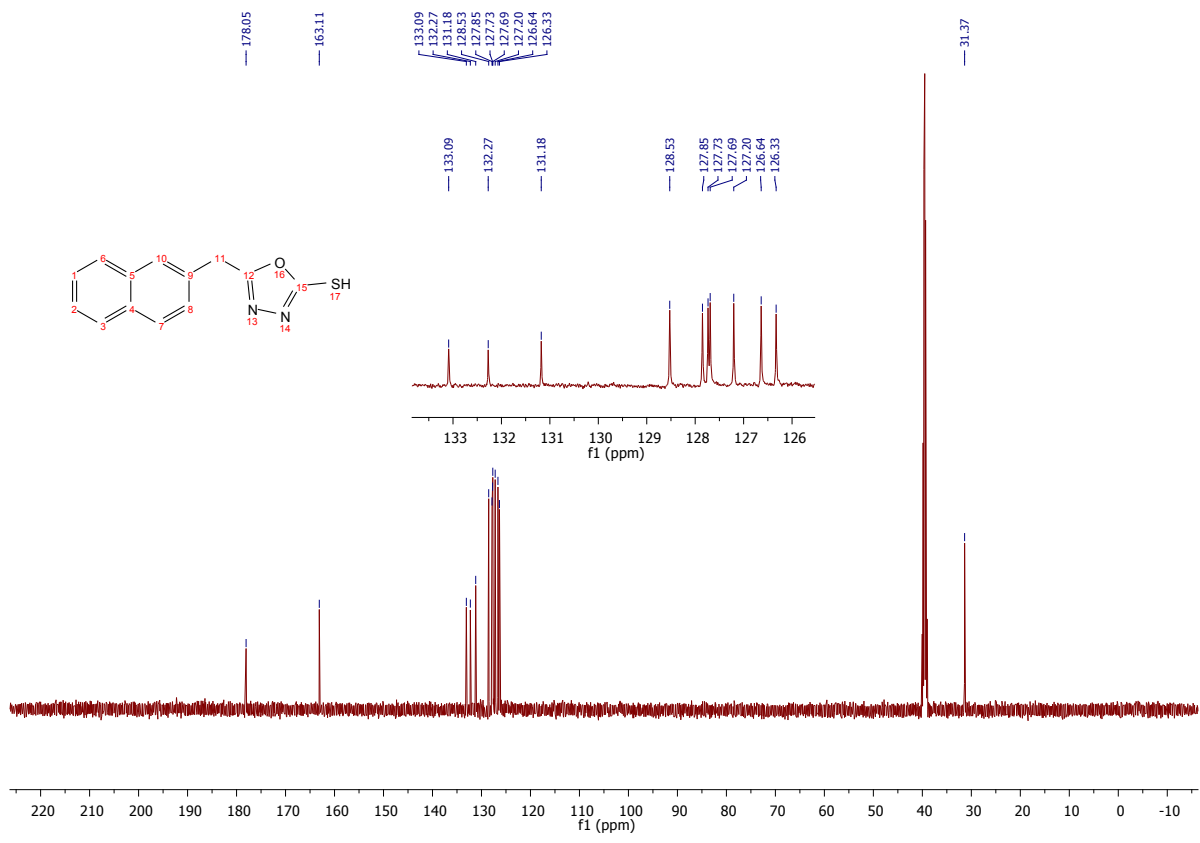

### NMR spectra of compound **3**

Compound **3**. 5-(naphthalen-2-ylmethyl)-3-(piperidin-1-ylmethyl)-1,3,4-oxadiazole-2(3H)-thione. colorless rod crystals. M.p 98-99°C.  $^1\text{H}$  NMR (500 MHz, dmsol)  $\delta$  7.85 (dd,  $J = 13.3, 10.9$  Hz, 1H), 7.80 (s, 1H), 7.51 – 7.43 (m, 1H), 7.40 (d,  $J = 8.9$  Hz, 1H), 4.83 (s, 1H), 4.25 (s, 1H), 2.57 (s, 1H), 1.58 – 1.18 (m, 2H).  $^{13}\text{C}$  NMR (126 MHz, DMSO)  $\delta$  178.38, 161.49, 133.36, 132.51, 128.77, 128.00, 127.92, 127.40, 126.90, 126.55, 71.00, 51.32, 31.61, 25.77, 23.68. ESI-HRMS: ( $\text{C}_{19}\text{H}_{21}\text{N}_3\text{OS}$ ) calc.  $[\text{M}+\text{H}]$  340.4650, found 340.4642.

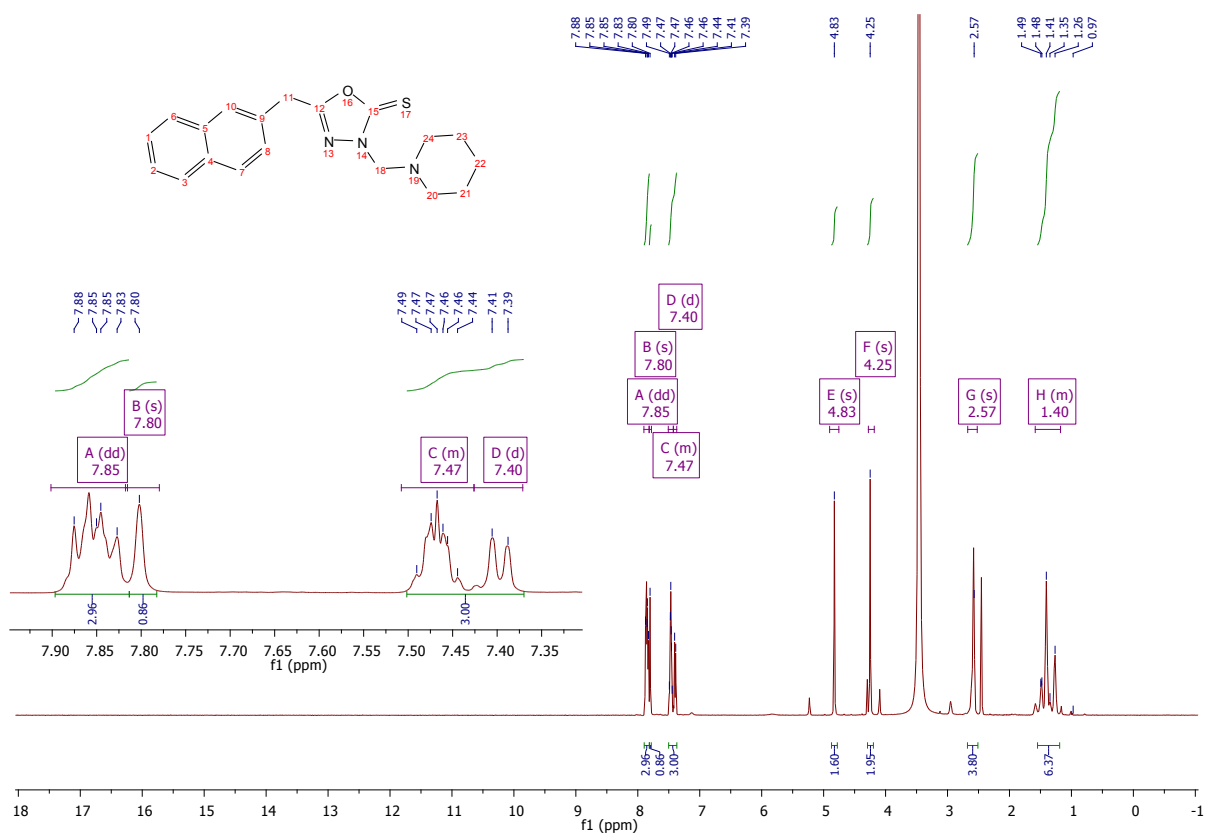

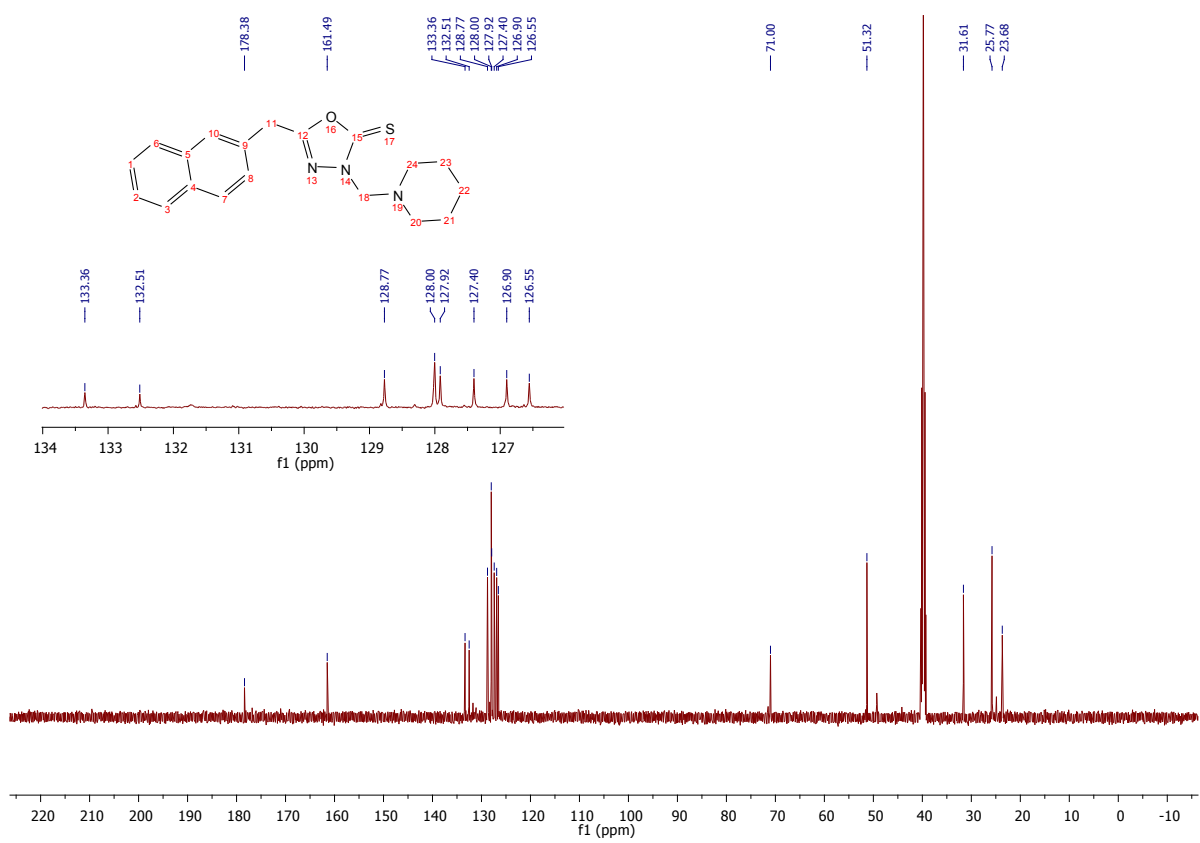

### 1.3 X-ray Structural Characterization of Compound 3

**Table 1.** Crystal data and structure refinement for compound 3.

|                                   |                                                               |                                                          |
|-----------------------------------|---------------------------------------------------------------|----------------------------------------------------------|
| Identification code               | boly341_0m                                                    |                                                          |
| Empirical formula                 | C <sub>19</sub> H <sub>21</sub> N <sub>3</sub> O <sub>5</sub> |                                                          |
| Formula weight                    | 339.45                                                        |                                                          |
| Temperature                       | 301(2) K                                                      |                                                          |
| Wavelength                        | 0.71073 Å                                                     |                                                          |
| Crystal system                    | Triclinic                                                     |                                                          |
| Space group                       | P -1                                                          |                                                          |
| Unit cell dimensions              | a = 7.0419(4) Å<br>b = 8.0935(5) Å<br>c = 15.4614(8) Å        | α = 85.744 (2)°.<br>β = 89.568 (2)°.<br>γ = 80.461 (2)°. |
| Volume                            | 866.61(9) Å <sup>3</sup>                                      |                                                          |
| Z                                 | 2                                                             |                                                          |
| Density (calculated)              | 1.301 Mg/m <sup>3</sup>                                       |                                                          |
| Absorption coefficient            | 0.197 mm <sup>-1</sup>                                        |                                                          |
| F(000)                            | 360                                                           |                                                          |
| Crystal size                      | 0.440 x 0.420 x 0.130 mm <sup>3</sup>                         |                                                          |
| Theta range for data collection   | 3.211 to 28.371°                                              |                                                          |
| Index ranges                      | -9 ≤ h ≤ 9, -10 ≤ k ≤ 10, -20 ≤ l ≤ 20                        |                                                          |
| Reflections collected             | 52192                                                         |                                                          |
| Independent reflections           | 4332 [R(int) = 0.0609]                                        |                                                          |
| Completeness to theta = 25.242°   | 99.8 %                                                        |                                                          |
| Refinement method                 | Full-matrix least-squares on F <sup>2</sup>                   |                                                          |
| Data / restraints / parameters    | 4332 / 0 / 217                                                |                                                          |
| Goodness-of-fit on F <sup>2</sup> | 1.109                                                         |                                                          |
| Final R indices [I > 2σ(I)]       | R1 = 0.0575, wR2 = 0.1094                                     |                                                          |
| R indices (all data)              | R1 = 0.0940, wR2 = 0.1240                                     |                                                          |
| Extinction coefficient            | n/a                                                           |                                                          |
| Largest diff. peak and hole       | 0.197 and -0.286 e.Å <sup>-3</sup>                            |                                                          |



**Table 2.** Atomic coordinates ( $\times 10^4$ ) and equivalent isotropic displacement parameters ( $\text{\AA}^2 \times 10^3$ ) for compound **3**.  $U(\text{eq})$  is defined as one third of the trace of the orthogonalized  $U^{ij}$  tensor.

|       | x        | y       | z        | U(eq) |
|-------|----------|---------|----------|-------|
| S(1)  | 2794(1)  | 3290(1) | 104(1)   | 48(1) |
| O(1)  | 2153(2)  | 6381(2) | -663(1)  | 37(1) |
| N(1)  | 2673(2)  | 6381(2) | 699(1)   | 35(1) |
| N(2)  | 2347(2)  | 8056(2) | 384(1)   | 38(1) |
| N(3)  | 1737(2)  | 6374(2) | 2189(1)  | 37(1) |
| C(1)  | 4783(3)  | 9871(2) | -1693(1) | 48(1) |
| C(2)  | 6142(3)  | 9795(2) | -2316(1) | 50(1) |
| C(3)  | 5866(3)  | 9113(2) | -3108(1) | 44(1) |
| C(4)  | 7263(3)  | 8996(3) | -3776(2) | 60(1) |
| C(5)  | 6945(4)  | 8318(3) | -4529(2) | 70(1) |
| C(6)  | 5228(4)  | 7724(3) | -4657(2) | 71(1) |
| C(7)  | 3851(4)  | 7819(3) | -4038(1) | 61(1) |
| C(8)  | 4130(3)  | 8519(2) | -3249(1) | 44(1) |
| C(9)  | 2727(3)  | 8630(2) | -2581(1) | 44(1) |
| C(10) | 3038(3)  | 9288(2) | -1820(1) | 40(1) |
| C(11) | 1565(3)  | 9381(2) | -1102(1) | 49(1) |
| C(12) | 2034(2)  | 7987(2) | -422(1)  | 36(1) |
| C(13) | 2553(2)  | 5349(2) | 73(1)    | 34(1) |
| C(14) | 3284(3)  | 5920(2) | 1591(1)  | 40(1) |
| C(15) | 210(3)   | 5374(3) | 2098(1)  | 45(1) |
| C(16) | -1430(3) | 5864(3) | 2708(1)  | 55(1) |
| C(17) | -702(4)  | 5664(3) | 3637(1)  | 65(1) |
| C(18) | 927(4)   | 6654(4) | 3717(1)  | 73(1) |
| C(19) | 2501(3)  | 6148(3) | 3073(1)  | 51(1) |

**Table 3.** Bond lengths [Å] and angles [°] for compound **3**.

---

|                  |            |
|------------------|------------|
| S(1)-C(13)       | 1.6439(18) |
| O(1)-C(13)       | 1.363(2)   |
| O(1)-C(12)       | 1.368(2)   |
| N(1)-C(13)       | 1.337(2)   |
| N(1)-N(2)        | 1.389(2)   |
| N(1)-C(14)       | 1.451(2)   |
| N(2)-C(12)       | 1.274(2)   |
| N(3)-C(14)       | 1.442(2)   |
| N(3)-C(19)       | 1.461(2)   |
| N(3)-C(15)       | 1.462(2)   |
| C(1)-C(2)        | 1.351(3)   |
| C(1)-C(10)       | 1.407(3)   |
| C(1)-H(1)        | 0.9300     |
| C(2)-C(3)        | 1.407(3)   |
| C(2)-H(2)        | 0.9300     |
| C(3)-C(8)        | 1.410(3)   |
| C(3)-C(4)        | 1.419(3)   |
| C(4)-C(5)        | 1.358(3)   |
| C(4)-H(4)        | 0.9300     |
| C(5)-C(6)        | 1.394(4)   |
| C(5)-H(5)        | 0.9300     |
| C(6)-C(7)        | 1.354(3)   |
| C(6)-H(6)        | 0.9300     |
| C(7)-C(8)        | 1.412(3)   |
| C(7)-H(7)        | 0.9300     |
| C(8)-C(9)        | 1.421(3)   |
| C(9)-C(10)       | 1.361(3)   |
| C(9)-H(9)        | 0.9300     |
| C(10)-C(11)      | 1.511(3)   |
| C(11)-C(12)      | 1.481(3)   |
| C(11)-H(11A)     | 0.9700     |
| C(11)-H(11B)     | 0.9700     |
| C(14)-H(14A)     | 0.9700     |
| C(14)-H(14B)     | 0.9700     |
| C(15)-C(16)      | 1.506(3)   |
| C(15)-H(15A)     | 0.9700     |
| C(15)-H(15B)     | 0.9700     |
| C(16)-C(17)      | 1.516(3)   |
| C(16)-H(16A)     | 0.9700     |
| C(16)-H(16B)     | 0.9700     |
| C(17)-C(18)      | 1.514(3)   |
| C(17)-H(17A)     | 0.9700     |
| C(17)-H(17B)     | 0.9700     |
| C(18)-C(19)      | 1.510(3)   |
| C(18)-H(18A)     | 0.9700     |
| C(18)-H(18B)     | 0.9700     |
| C(19)-H(19A)     | 0.9700     |
| C(19)-H(19B)     | 0.9700     |
| C(13)-O(1)-C(12) | 106.35(13) |
| C(13)-N(1)-N(2)  | 111.95(14) |
| C(13)-N(1)-C(14) | 127.37(15) |
| N(2)-N(1)-C(14)  | 120.30(14) |
| C(12)-N(2)-N(1)  | 103.51(14) |
| C(14)-N(3)-C(19) | 109.20(14) |
| C(14)-N(3)-C(15) | 111.12(14) |

|                     |            |
|---------------------|------------|
| C(19)-N(3)-C(15)    | 110.66(14) |
| C(2)-C(1)-C(10)     | 121.02(18) |
| C(2)-C(1)-H(1)      | 119.5      |
| C(10)-C(1)-H(1)     | 119.5      |
| C(1)-C(2)-C(3)      | 121.02(19) |
| C(1)-C(2)-H(2)      | 119.5      |
| C(3)-C(2)-H(2)      | 119.5      |
| C(2)-C(3)-C(8)      | 118.97(18) |
| C(2)-C(3)-C(4)      | 122.85(19) |
| C(8)-C(3)-C(4)      | 118.18(19) |
| C(5)-C(4)-C(3)      | 121.0(2)   |
| C(5)-C(4)-H(4)      | 119.5      |
| C(3)-C(4)-H(4)      | 119.5      |
| C(4)-C(5)-C(6)      | 120.3(2)   |
| C(4)-C(5)-H(5)      | 119.9      |
| C(6)-C(5)-H(5)      | 119.9      |
| C(7)-C(6)-C(5)      | 120.7(2)   |
| C(7)-C(6)-H(6)      | 119.7      |
| C(5)-C(6)-H(6)      | 119.7      |
| C(6)-C(7)-C(8)      | 120.6(2)   |
| C(6)-C(7)-H(7)      | 119.7      |
| C(8)-C(7)-H(7)      | 119.7      |
| C(3)-C(8)-C(7)      | 119.24(19) |
| C(3)-C(8)-C(9)      | 118.45(17) |
| C(7)-C(8)-C(9)      | 122.31(19) |
| C(10)-C(9)-C(8)     | 121.29(18) |
| C(10)-C(9)-H(9)     | 119.4      |
| C(8)-C(9)-H(9)      | 119.4      |
| C(9)-C(10)-C(1)     | 119.25(18) |
| C(9)-C(10)-C(11)    | 121.47(18) |
| C(1)-C(10)-C(11)    | 119.27(17) |
| C(12)-C(11)-C(10)   | 112.19(15) |
| C(12)-C(11)-H(11A)  | 109.2      |
| C(10)-C(11)-H(11A)  | 109.2      |
| C(12)-C(11)-H(11B)  | 109.2      |
| C(10)-C(11)-H(11B)  | 109.2      |
| H(11A)-C(11)-H(11B) | 107.9      |
| N(2)-C(12)-O(1)     | 113.27(15) |
| N(2)-C(12)-C(11)    | 128.97(17) |
| O(1)-C(12)-C(11)    | 117.76(15) |
| N(1)-C(13)-O(1)     | 104.91(14) |
| N(1)-C(13)-S(1)     | 131.15(14) |
| O(1)-C(13)-S(1)     | 123.94(12) |
| N(3)-C(14)-N(1)     | 111.47(14) |
| N(3)-C(14)-H(14A)   | 109.3      |
| N(1)-C(14)-H(14A)   | 109.3      |
| N(3)-C(14)-H(14B)   | 109.3      |
| N(1)-C(14)-H(14B)   | 109.3      |
| H(14A)-C(14)-H(14B) | 108.0      |
| N(3)-C(15)-C(16)    | 111.46(16) |
| N(3)-C(15)-H(15A)   | 109.3      |
| C(16)-C(15)-H(15A)  | 109.3      |
| N(3)-C(15)-H(15B)   | 109.3      |
| C(16)-C(15)-H(15B)  | 109.3      |
| H(15A)-C(15)-H(15B) | 108.0      |
| C(15)-C(16)-C(17)   | 110.11(18) |
| C(15)-C(16)-H(16A)  | 109.6      |

|                     |            |
|---------------------|------------|
| C(17)-C(16)-H(16A)  | 109.6      |
| C(15)-C(16)-H(16B)  | 109.6      |
| C(17)-C(16)-H(16B)  | 109.6      |
| H(16A)-C(16)-H(16B) | 108.2      |
| C(18)-C(17)-C(16)   | 109.60(18) |
| C(18)-C(17)-H(17A)  | 109.7      |
| C(16)-C(17)-H(17A)  | 109.7      |
| C(18)-C(17)-H(17B)  | 109.7      |
| C(16)-C(17)-H(17B)  | 109.7      |
| H(17A)-C(17)-H(17B) | 108.2      |
| C(19)-C(18)-C(17)   | 111.00(18) |
| C(19)-C(18)-H(18A)  | 109.4      |
| C(17)-C(18)-H(18A)  | 109.4      |
| C(19)-C(18)-H(18B)  | 109.4      |
| C(17)-C(18)-H(18B)  | 109.4      |
| H(18A)-C(18)-H(18B) | 108.0      |
| N(3)-C(19)-C(18)    | 110.72(18) |
| N(3)-C(19)-H(19A)   | 109.5      |
| C(18)-C(19)-H(19A)  | 109.5      |
| N(3)-C(19)-H(19B)   | 109.5      |
| C(18)-C(19)-H(19B)  | 109.5      |
| H(19A)-C(19)-H(19B) | 108.1      |

---

Symmetry transformations used to generate equivalent atoms:

**Table 4.** Anisotropic displacement parameters ( $\text{\AA}^2 \times 10^3$ ) for compound **3**. The anisotropic displacement factor exponent takes the form:  $-2\pi^2 [ h^2 a^{*2} U^{11} + \dots + 2 h k a^* b^* U^{12} ]$

|       | U <sup>11</sup> | U <sup>22</sup> | U <sup>33</sup> | U <sup>23</sup> | U <sup>13</sup> | U <sup>12</sup> |
|-------|-----------------|-----------------|-----------------|-----------------|-----------------|-----------------|
| S(1)  | 44(1)           | 40(1)           | 61(1)           | -10(1)          | 6(1)            | -7(1)           |
| O(1)  | 35(1)           | 43(1)           | 34(1)           | -10(1)          | 3(1)            | -7(1)           |
| N(1)  | 33(1)           | 41(1)           | 33(1)           | -7(1)           | 3(1)            | -7(1)           |
| N(2)  | 36(1)           | 40(1)           | 39(1)           | -8(1)           | 4(1)            | -4(1)           |
| N(3)  | 36(1)           | 46(1)           | 31(1)           | -5(1)           | 0(1)            | -12(1)          |
| C(1)  | 56(1)           | 41(1)           | 46(1)           | -4(1)           | -9(1)           | -8(1)           |
| C(2)  | 47(1)           | 46(1)           | 60(1)           | -1(1)           | -9(1)           | -14(1)          |
| C(3)  | 48(1)           | 36(1)           | 47(1)           | 4(1)            | -1(1)           | -6(1)           |
| C(4)  | 56(1)           | 54(1)           | 67(2)           | 6(1)            | 8(1)            | -9(1)           |
| C(5)  | 84(2)           | 68(2)           | 54(1)           | -1(1)           | 22(1)           | -5(1)           |
| C(6)  | 93(2)           | 77(2)           | 44(1)           | -11(1)          | 6(1)            | -13(1)          |
| C(7)  | 74(2)           | 65(1)           | 47(1)           | -9(1)           | -4(1)           | -19(1)          |
| C(8)  | 53(1)           | 38(1)           | 41(1)           | 0(1)            | -3(1)           | -8(1)           |
| C(9)  | 45(1)           | 43(1)           | 45(1)           | -1(1)           | -5(1)           | -10(1)          |
| C(10) | 45(1)           | 31(1)           | 40(1)           | 2(1)            | -3(1)           | 0(1)            |
| C(11) | 49(1)           | 45(1)           | 47(1)           | -3(1)           | 0(1)            | 8(1)            |
| C(12) | 30(1)           | 39(1)           | 40(1)           | -9(1)           | 5(1)            | -3(1)           |
| C(13) | 23(1)           | 43(1)           | 37(1)           | -9(1)           | 6(1)            | -6(1)           |
| C(14) | 33(1)           | 52(1)           | 36(1)           | -4(1)           | -3(1)           | -8(1)           |
| C(15) | 40(1)           | 57(1)           | 42(1)           | -8(1)           | 0(1)            | -17(1)          |
| C(16) | 41(1)           | 57(1)           | 68(1)           | -3(1)           | 11(1)           | -11(1)          |
| C(17) | 73(2)           | 73(2)           | 53(1)           | -14(1)          | 26(1)           | -27(1)          |
| C(18) | 96(2)           | 95(2)           | 42(1)           | -25(1)          | 19(1)           | -46(2)          |
| C(19) | 58(1)           | 66(1)           | 35(1)           | -3(1)           | -4(1)           | -27(1)          |

**Table 5.** Hydrogen coordinates ( $\times 10^4$ ) and isotropic displacement parameters ( $\text{\AA}^2 \times 10^3$ ) for compound **3**.

|        | x     | y     | z     | U(eq) |
|--------|-------|-------|-------|-------|
| H(1)   | 5003  | 10316 | -1173 | 57    |
| H(2)   | 7278  | 10200 | -2221 | 60    |
| H(4)   | 8414  | 9389  | -3698 | 72    |
| H(5)   | 7876  | 8250  | -4960 | 84    |
| H(6)   | 5026  | 7257  | -5174 | 85    |
| H(7)   | 2712  | 7419  | -4134 | 73    |
| H(9)   | 1574  | 8245  | -2665 | 53    |
| H(11A) | 1499  | 10443 | -841  | 58    |
| H(11B) | 309   | 9345  | -1346 | 58    |
| H(14A) | 3730  | 4718  | 1664  | 48    |
| H(14B) | 4352  | 6481  | 1721  | 48    |
| H(15A) | 733   | 4193  | 2218  | 54    |
| H(15B) | -268  | 5532  | 1506  | 54    |
| H(16A) | -2402 | 5160  | 2646  | 66    |
| H(16B) | -2017 | 7022  | 2565  | 66    |
| H(17A) | -1742 | 6068  | 4022  | 77    |
| H(17B) | -250  | 4486  | 3804  | 77    |
| H(18A) | 434   | 7844  | 3616  | 88    |
| H(18B) | 1453  | 6457  | 4301  | 88    |
| H(19A) | 3504  | 6826  | 3122  | 61    |
| H(19B) | 3067  | 4980  | 3204  | 61    |

**Table 6.** Torsion angles [°] for compound **3**.

|                         |             |
|-------------------------|-------------|
| C(13)-N(1)-N(2)-C(12)   | 0.17(18)    |
| C(14)-N(1)-N(2)-C(12)   | 173.64(14)  |
| C(10)-C(1)-C(2)-C(3)    | -0.7(3)     |
| C(1)-C(2)-C(3)-C(8)     | 0.6(3)      |
| C(1)-C(2)-C(3)-C(4)     | -179.43(19) |
| C(2)-C(3)-C(4)-C(5)     | 179.6(2)    |
| C(8)-C(3)-C(4)-C(5)     | -0.5(3)     |
| C(3)-C(4)-C(5)-C(6)     | 0.1(4)      |
| C(4)-C(5)-C(6)-C(7)     | 0.3(4)      |
| C(5)-C(6)-C(7)-C(8)     | -0.1(4)     |
| C(2)-C(3)-C(8)-C(7)     | -179.42(19) |
| C(4)-C(3)-C(8)-C(7)     | 0.7(3)      |
| C(2)-C(3)-C(8)-C(9)     | -0.2(3)     |
| C(4)-C(3)-C(8)-C(9)     | 179.88(17)  |
| C(6)-C(7)-C(8)-C(3)     | -0.3(3)     |
| C(6)-C(7)-C(8)-C(9)     | -179.5(2)   |
| C(3)-C(8)-C(9)-C(10)    | -0.1(3)     |
| C(7)-C(8)-C(9)-C(10)    | 179.05(19)  |
| C(8)-C(9)-C(10)-C(1)    | 0.1(3)      |
| C(8)-C(9)-C(10)-C(11)   | -178.91(16) |
| C(2)-C(1)-C(10)-C(9)    | 0.4(3)      |
| C(2)-C(1)-C(10)-C(11)   | 179.39(17)  |
| C(9)-C(10)-C(11)-C(12)  | 98.9(2)     |
| C(1)-C(10)-C(11)-C(12)  | -80.0(2)    |
| N(1)-N(2)-C(12)-O(1)    | -0.69(18)   |
| N(1)-N(2)-C(12)-C(11)   | 178.92(17)  |
| C(13)-O(1)-C(12)-N(2)   | 0.95(18)    |
| C(13)-O(1)-C(12)-C(11)  | -178.70(15) |
| C(10)-C(11)-C(12)-N(2)  | 120.3(2)    |
| C(10)-C(11)-C(12)-O(1)  | -60.1(2)    |
| N(2)-N(1)-C(13)-O(1)    | 0.39(17)    |
| C(14)-N(1)-C(13)-O(1)   | -172.51(14) |
| N(2)-N(1)-C(13)-S(1)    | -179.34(13) |
| C(14)-N(1)-C(13)-S(1)   | 7.8(3)      |
| C(12)-O(1)-C(13)-N(1)   | -0.76(16)   |
| C(12)-O(1)-C(13)-S(1)   | 179.00(12)  |
| C(19)-N(3)-C(14)-N(1)   | -170.51(15) |
| C(15)-N(3)-C(14)-N(1)   | 67.1(2)     |
| C(13)-N(1)-C(14)-N(3)   | -115.43(18) |
| N(2)-N(1)-C(14)-N(3)    | 72.19(19)   |
| C(14)-N(3)-C(15)-C(16)  | -178.89(16) |
| C(19)-N(3)-C(15)-C(16)  | 59.6(2)     |
| N(3)-C(15)-C(16)-C(17)  | -57.6(2)    |
| C(15)-C(16)-C(17)-C(18) | 54.7(3)     |
| C(16)-C(17)-C(18)-C(19) | -54.9(3)    |
| C(14)-N(3)-C(19)-C(18)  | 178.60(17)  |
| C(15)-N(3)-C(19)-C(18)  | -58.8(2)    |
| C(17)-C(18)-C(19)-N(3)  | 57.1(3)     |

Symmetry transformations used to generate equivalent atoms:

**Table 7.** Hydrogen bonds for compound **3** [Å and °].

| D-H...A | d(D-H) | d(H...A) | d(D...A) | <(DHA) |
|---------|--------|----------|----------|--------|
|---------|--------|----------|----------|--------|



## 2. Biology

### 2.1 Lineweaver-Burk plots for Kojic Acid and Rhodanine

**Figure 1** Lineweaver-Burk plots for inhibition of kojic acid on the oxidation of L-DOPA by mushroom tyrosinase. Concentrations of kojic acid for curves 0-4 were 0, 5, 10, 15, and 20  $\mu\text{M}$ , respectively. The inset represents the secondary plot of slope or Y-intercept versus the kojic acid concentration for determining the  $K_i$  and  $K_{is}$ . The line was drawn using linear least square fit.

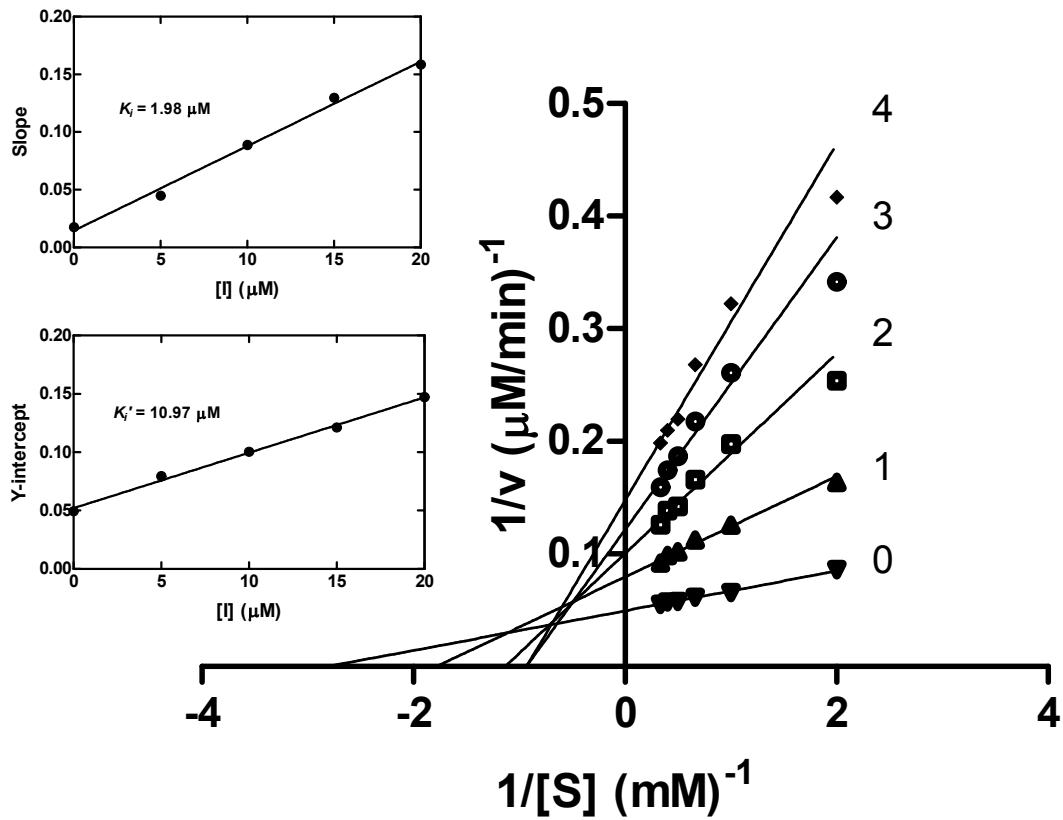

**Figure 2** Lineweaver-Burk plots for inhibition of rhodanine on the oxidation of L-DOPA by mushroom tyrosinase. Concentrations of rhodanine for curves 0-4 were 0, 20, 30, 40, and 80  $\mu\text{M}$ , respectively. The inset represents the secondary plot of slope or Y-intercept versus the rhodanine concentration for determining the  $K_i$  and  $K_{iS}$ . The line was drawn using linear least square fit.

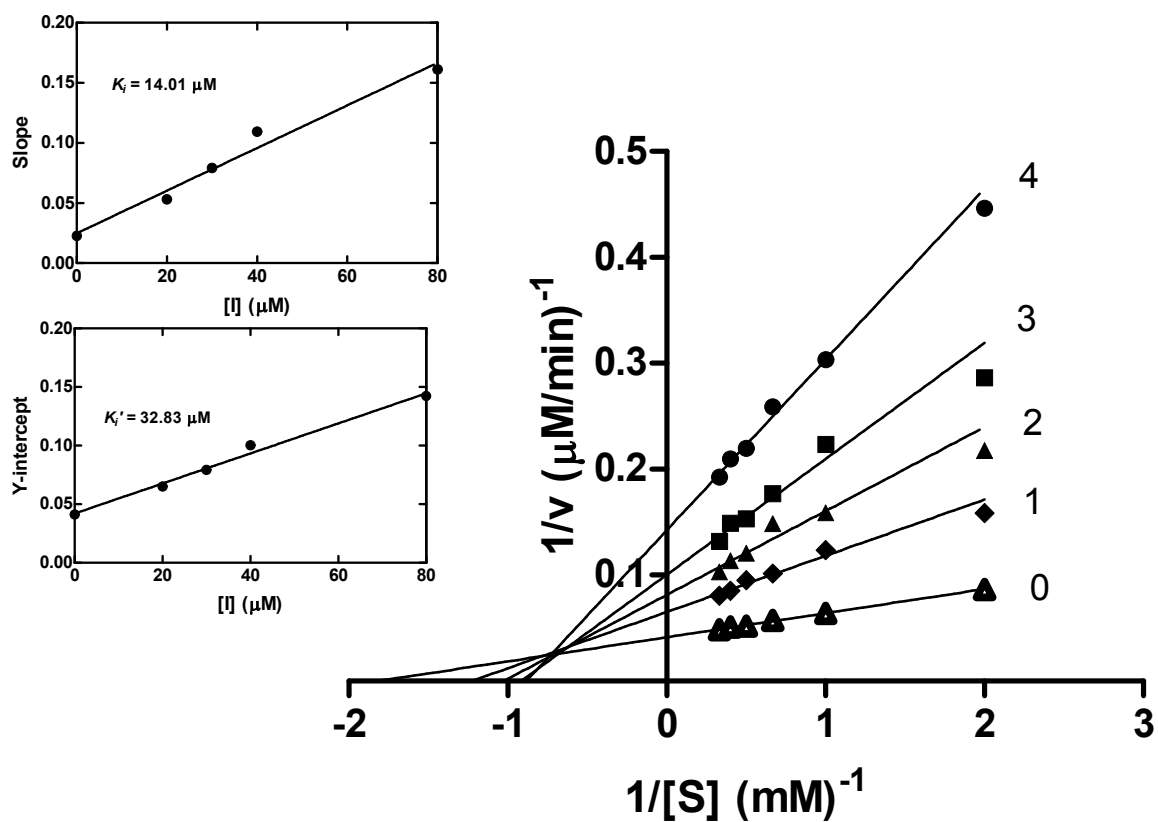

### 3. Computational studies

#### 3.1 Molecular docking and dynamics simulation

**Fig. 3.** RMSD plots of tyrosinase backbone in complex with compound 2 (black line) and compound 2 (red line) as a function of simulation time.

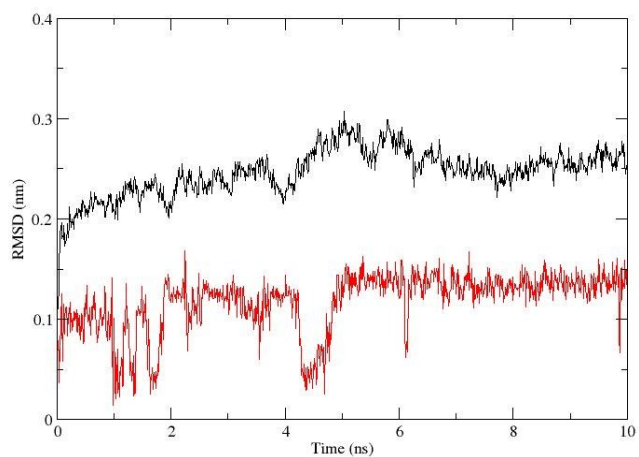

**Fig. 4.** RMSF plot of selected tyrosinase residues in complex with compound 2 during the final 5 ns of simulation.

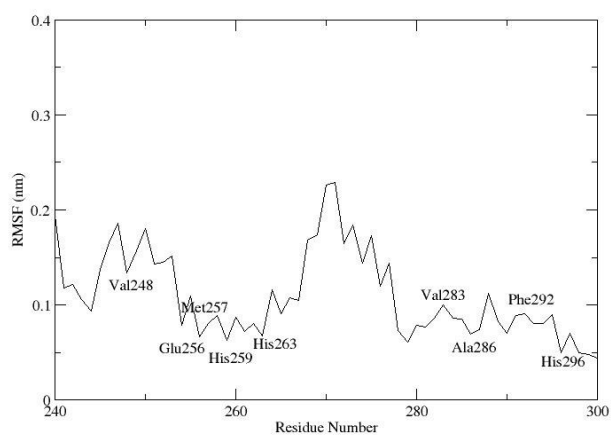

Supplement: c6ra12754a1.pdf [file c6ra12754a1.pdf]
